# Supplementary material
Source: PubMed Central journal article supplement (PMC7668029)
Supplement: pnas.2017234117.sapp.pdf [file pnas.2017234117.sapp.pdf]

Supplementary Information for

**An allosteric peptide inhibitor of HIF-1 $\alpha$  regulates hypoxia-induced retinal  
neovascularization**

Ayumi Usui-Ouchi<sup>1,2</sup>, Edith Aguilar<sup>1</sup>, Salome Murinello<sup>1</sup>, Mitchell Prins<sup>4</sup>, Marin L. Gantner<sup>4</sup>,  
Peter E. Wright<sup>3</sup>, Rebecca B. Berlow<sup>3\*</sup>, Martin Friedlander<sup>1,4\*</sup>.

<sup>1</sup> Department of Molecular Medicine, The Scripps Research Institute, 10550 North Torrey Pines Road, La Jolla, CA 92037, USA.

<sup>2</sup> Department of Ophthalmology, Juntendo University School of Medicine, 2-1-1 Hongo Bunkyo-ku Tokyo, 113-8421, JAPAN.

<sup>3</sup> Department of Integrative Structural and Computational Biology, The Scripps Research Institute, 10550 North Torrey Pines Road, La Jolla, CA 92037, USA.

<sup>4</sup> The Lowy Medical Research Institute, 3366 N. Torrey Pines Court, Suite 300, La Jolla, CA 92037, USA.

\* Corresponding authors: Rebecca B. Berlow and Martin Friedlander

**Email:** rberlow@scripps.edu; friedlan@scripps.edu

**This PDF file includes:**

Figures S1 to S5  
Tables S1 to S2

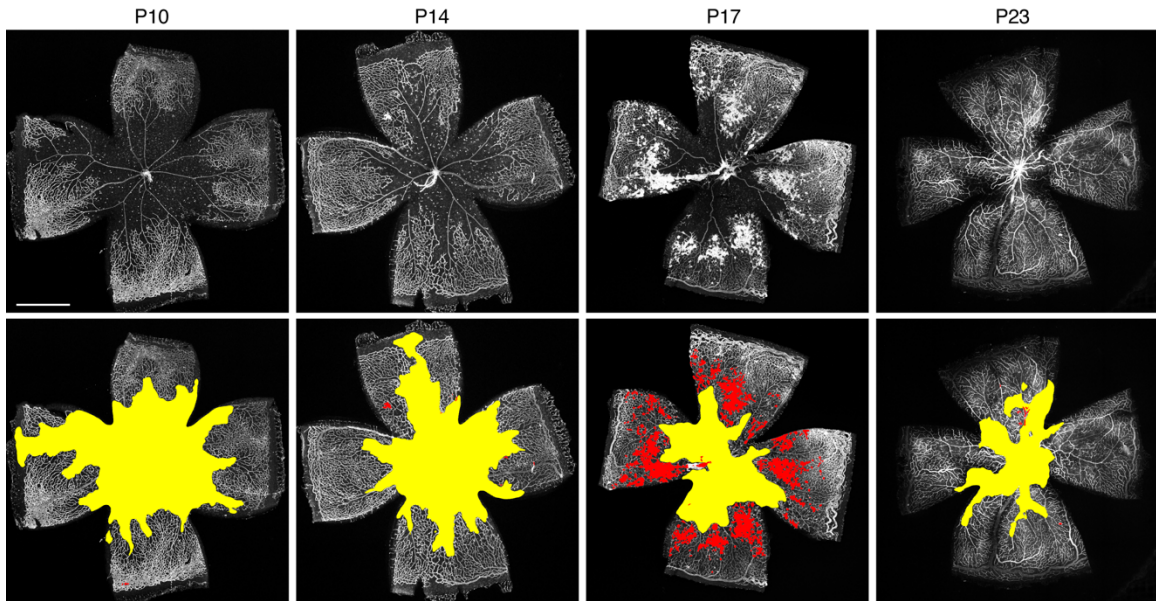

**Fig. S1. Immunofluorescent staining of OIR retinas.** Retinal whole mounts were prepared at P10, P14, P17, and P23 and stained with GS-lectin. The raw images for each time point are shown in the top row, with the corresponding quantified and annotated images shown below, with NV highlighted in red and VO highlighted in yellow. Scale bars: 1 mm.

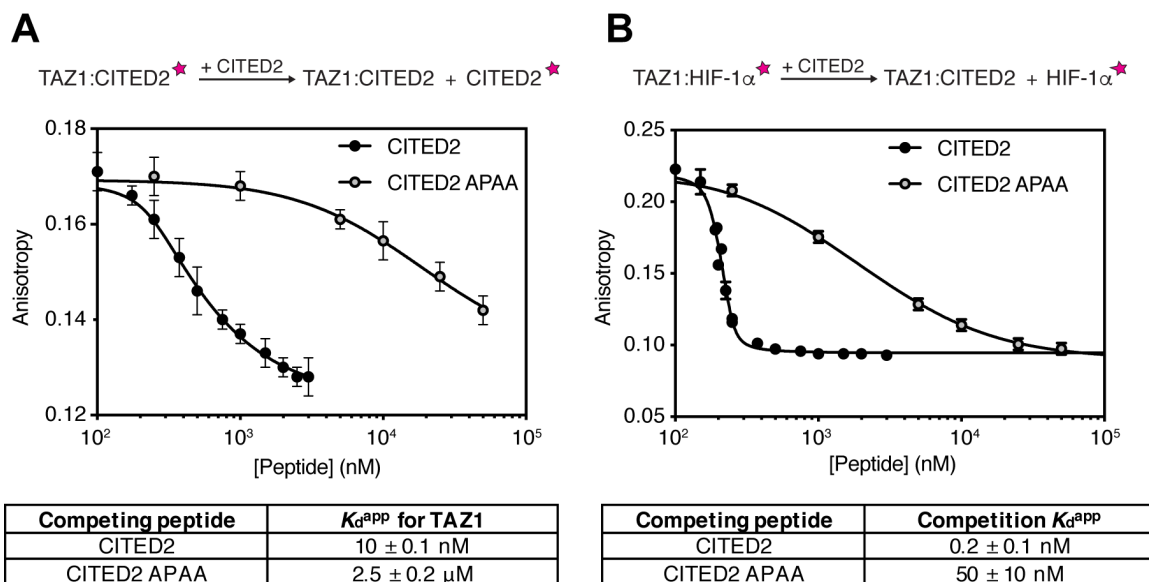

**Fig. S2. The CITED2 APAA peptide is deficient in binding and competing with HIF-1 $\alpha$  for the TAZ1 domain of CBP/p300.** (A) Fluorescence anisotropy data for titration of unlabeled CITED2 and CITED2 APAA peptides into a pre-formed complex of Alexa594-labeled CITED2 and unlabeled TAZ1. A schematic of the experimental design is shown above the graph. The apparent binding affinities ( $K_d^{app}$ ) of the CITED2 peptides for TAZ1 are reported below the graph. (B) Fluorescence anisotropy data for titration of unlabeled CITED2 and CITED2 APAA peptides into a pre-formed complex of Alexa594-labeled HIF-1 $\alpha$  and unlabeled TAZ1. A schematic of the experimental design is shown above the graph. The apparent affinities of the CITED2 peptides competing with HIF-1 $\alpha$  for TAZ1 binding (competition  $K_d^{app}$ ) are reported below the graph. For (A) and (B), data for the CITED2 peptide are shown in black and for the CITED2 APAA peptide in grey. The data shown represent the mean (circles) and standard deviation (error bars) of three independent replicates.

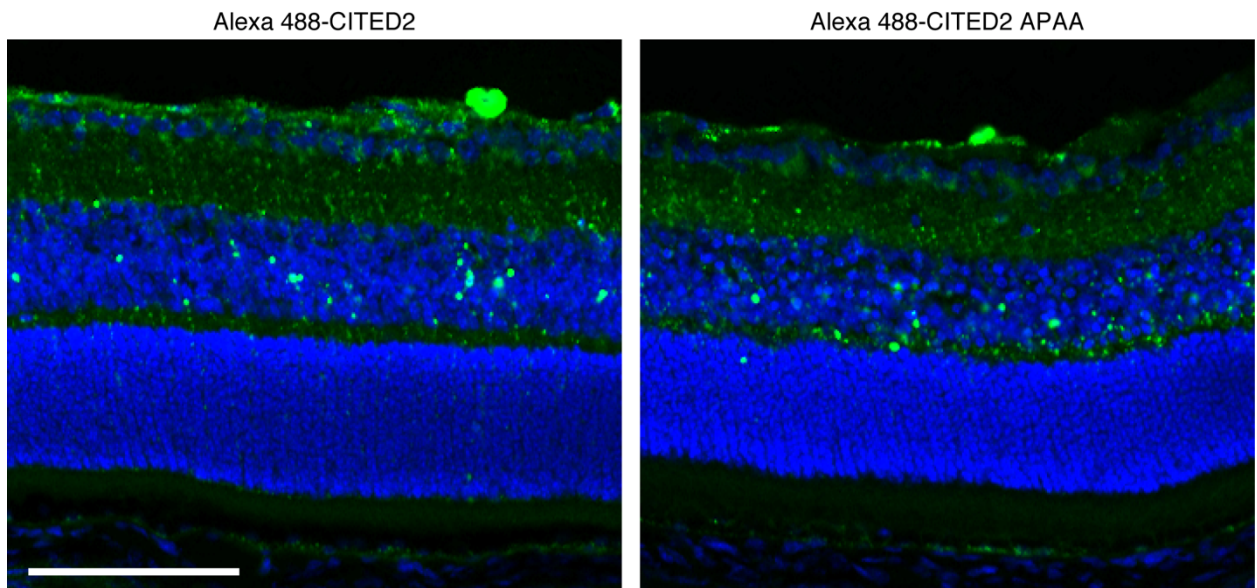

**Fig. S3. The distribution of Alexa488-CITED2 and Alexa488-CITED2 APAA in OIR retinas.** Retinal cross-sections were stained with DAPI 12 hours after intravitreal injection of Alexa488-CITED2 or Alexa488-CITED2 APAA. Scale bars: 100  $\mu\text{m}$ .

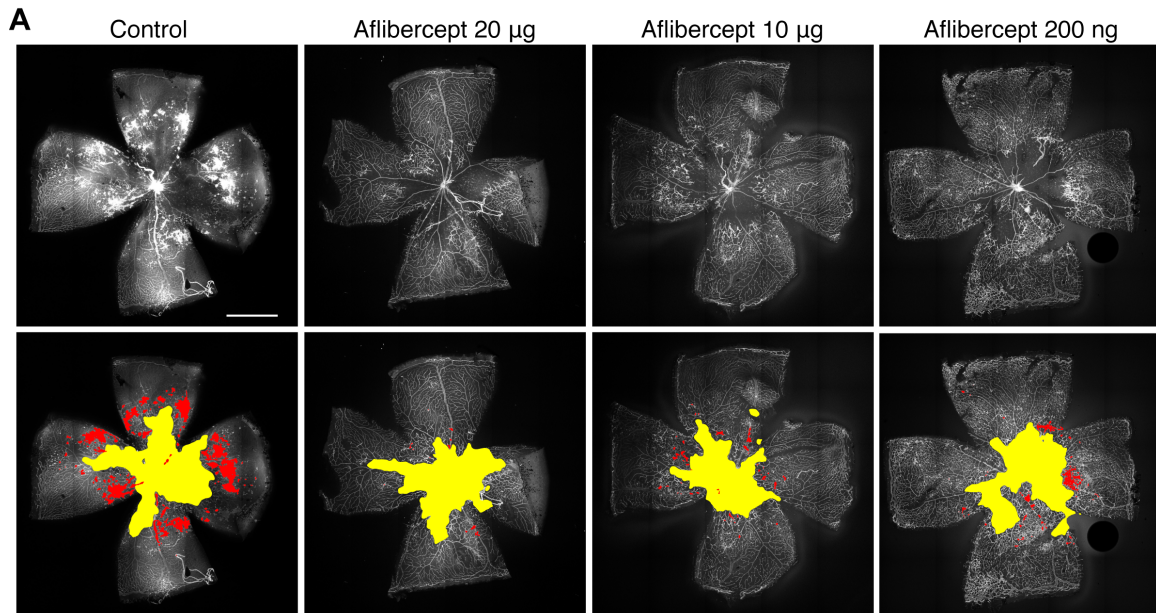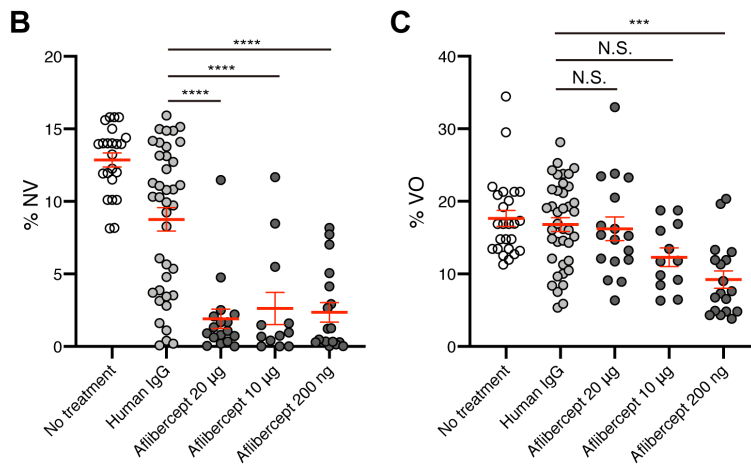

**Fig. S4. Aflibercept rescues OIR-induced neovascularization but not vaso-obliteration.** (A) Immunofluorescent staining of P17 OIR retinas. OIR mice were intravitreally injected with 0.5  $\mu$ L of Aflibercept (20  $\mu$ g, 10  $\mu$ g, 200 ng) or human IgG (1  $\mu$ g) as an isotype control. Retinal whole mounts were stained with GS-lectin. Representative images are shown in the top row; the same images are shown directly below with NV highlighted in red and VO highlighted in yellow as used for quantification. Scale bars = 1 mm. (B) Quantification of the percentage of NV area in whole retinas. (C) Quantification of the percentage of VO area in whole retinas. For (B) and (C),  $n > 8$  per group.  $P$ -values were calculated using one-way ANOVA with Tukey's multiple comparisons test. \*\*\*\* $P < 0.0001$ . N.S., not significant. The mean and SEM are shown in red.

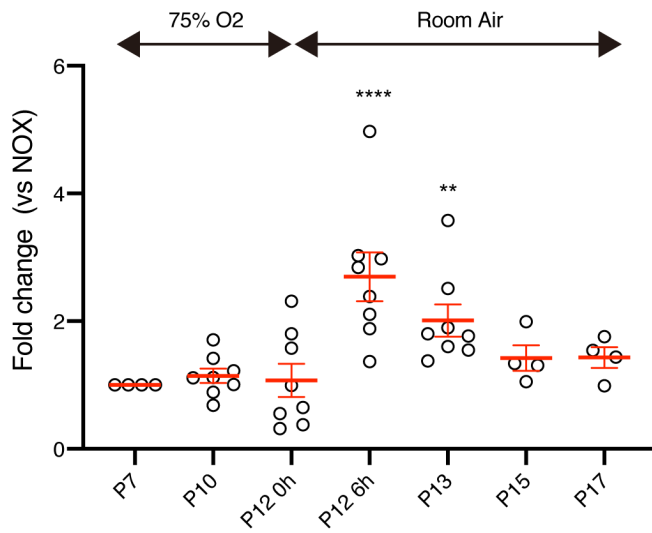

**Fig. S5. The expression level of *Cited2* mRNA at various time points of the OIR experiment.** Total RNA was isolated from OIR retinas. The expression levels are normalized to *Cited2* expression in retinal cells from age-matched normoxic controls ( $n > 4$  for each time point). The mean and SEM are shown in red.  $P$ -values were calculated using a two-way ANOVA test. \*\*  $P < 0.01$ , \*\*\*\*  $P < 0.0001$ .

**Table S1. Primer sequences for PCR.**

|                         |                          |
|-------------------------|--------------------------|
| <i>36b4</i> forward     | CTGTGCCAGCTCAGAACACTG    |
| <i>36b4</i> reverse     | TGATCAGCCCGAAGGAGAAG     |
| <i>Vegfa</i> forward    | AACGATGAAGCCCTGGAGT      |
| <i>Vegfa</i> reverse    | AGGTTTGATCCGCATGATCT     |
| <i>Epo</i> forward      | CGACAAAGCCATCAGTGGTCTACG |
| <i>Epo</i> reverse      | GCAGAAAGTATCCACTGTGAGTG  |
| <i>Ndufa4l2</i> forward | TGGCTTCATCTGCTTGGGCATG   |
| <i>Ndufa4l2</i> reverse | GTCATTGGGACTCAGGCCGGTTC  |
| <i>Ldha</i> forward     | GGCACTGACGCAGACAAG       |
| <i>Ldha</i> reverse     | TGATCACCTCGTAGGCACTG     |
| <i>ActB</i> forward     | AGATCTGGCACCACACCTTC     |
| <i>ActB</i> reverse     | GGGGTGTGAAAGGTCTCAA      |
| <i>Tie2</i> forward     | CGGCCAGGTACATAGGAGGAA    |
| <i>Tie2</i> reverse     | CCCCCACTTCTGAGCTTCAC     |
| <i>CD11b</i> forward    | CCCAGAACCTCTCAAGTGCC     |
| <i>CD11b</i> reverse    | CTGCAACAGAGCAGTTCAGC     |
| <i>Vim</i> forward      | GGCTCGTCACCTTCGTGAAT     |
| <i>Vim</i> reverse      | AGAAAAGGTTGGCAGAGGCA     |
| <i>Pax6</i> forward     | GTTCTTCGCAACCTGGCTA      |
| <i>Pax6</i> reverse     | TGAGCTTCATCCGAGTCTTCT    |
| <i>Glul</i> forward     | TGCCTGCCCAGTGGGAATT      |
| <i>Glul</i> reverse     | TATTGGAAGGGTTCGTCGCC     |
| <i>Gfap</i> forward     | GCACTCAATACGAGGCAGTG     |
| <i>Gfap</i> reverse     | GGCGATAGTCGTTAGCTTCG     |
| <i>Fgf11</i> forward    | TCCTCATCCTGCTGTCCAAGGT   |
| <i>Fgf11</i> reverse    | ATTCGCCTGGAGGTAGAAACCC   |

**Table S2. Taqman assays for PCR.**

|               |               |
|---------------|---------------|
| <i>ActB</i>   | Mm02619580_g1 |
| <i>Vegfa</i>  | Mm00437306_m1 |
| <i>Epo</i>    | Mm01202755_m1 |
| <i>Tnfa</i>   | Mm00443258_m1 |
| <i>Ccl2</i>   | Mm00441242_m1 |
| <i>Ccl3</i>   | Mm00441259_g1 |
| <i>Il1b</i>   | Mm00434228_m1 |
| <i>Cited2</i> | Mm01188099_g1 |
